# Supplementary material
Source: Springer Nature journal article supplement (https://www.springermedizin.de/resource/supplementary/12874_2011_608_MOESM2_ESM.pdf/9432246)
Supplement: MOESM2 [file 9432246]

Survival Probability

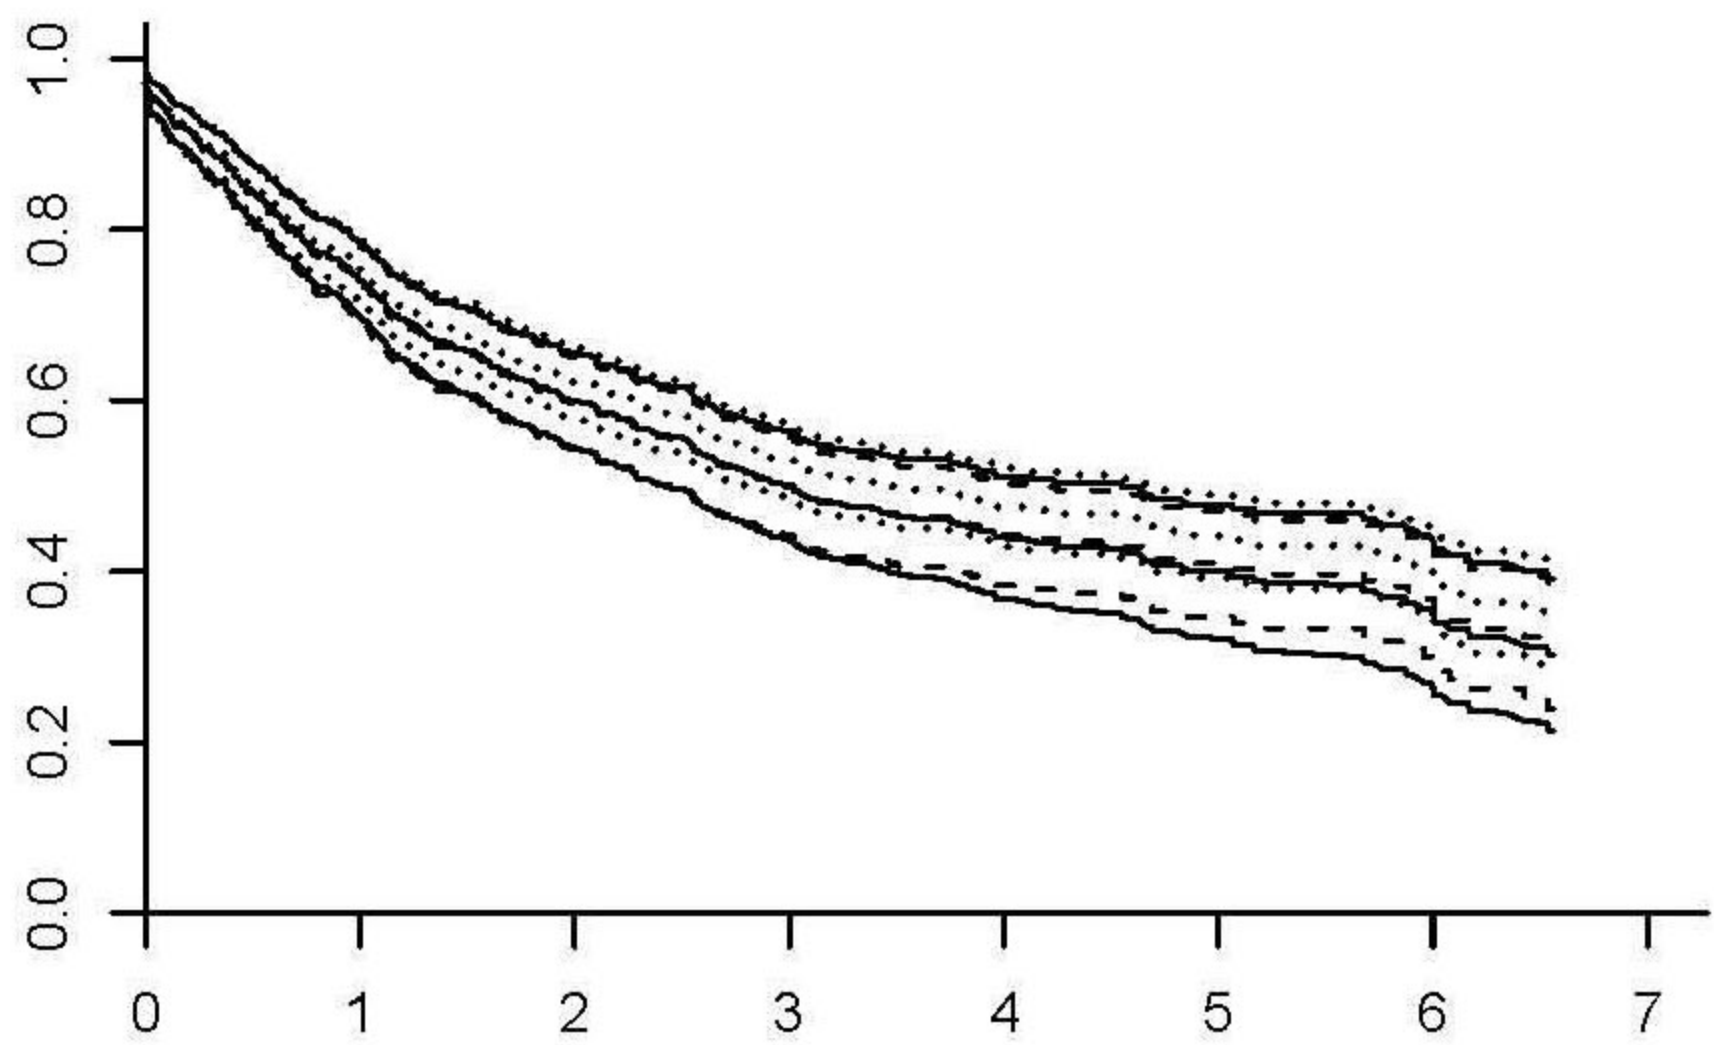

Years

Survival Probability

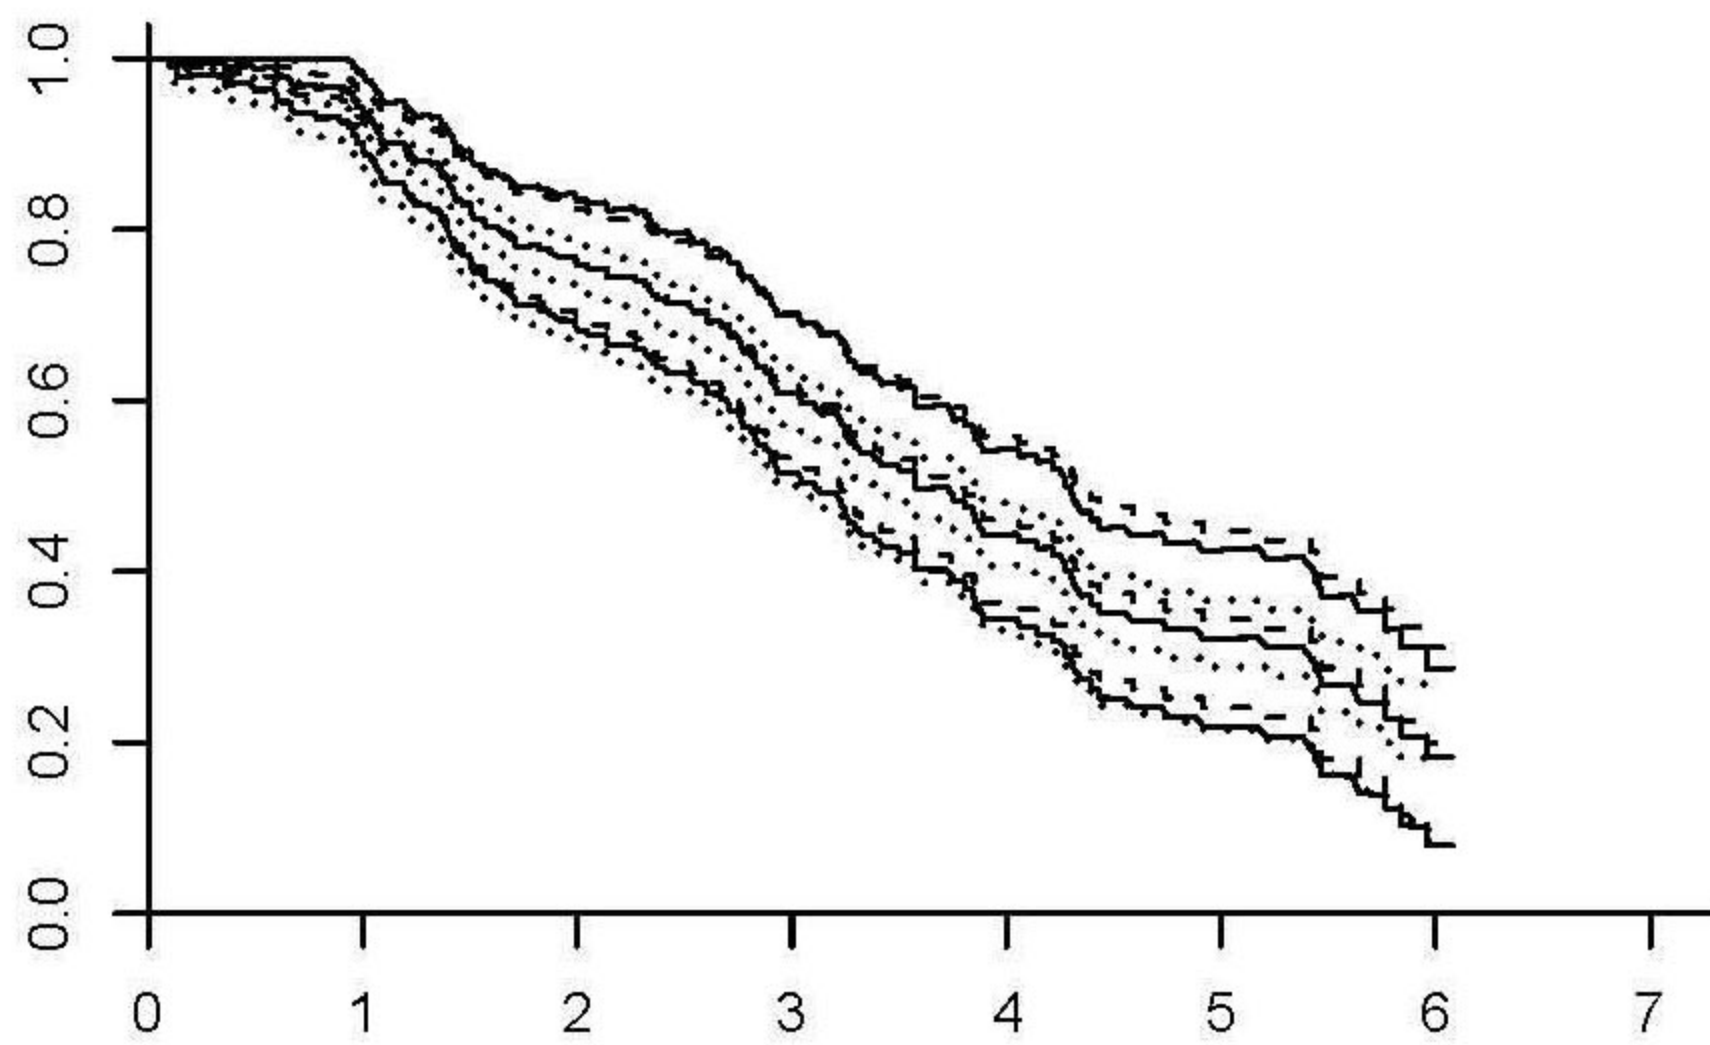

Years

Survival Probability

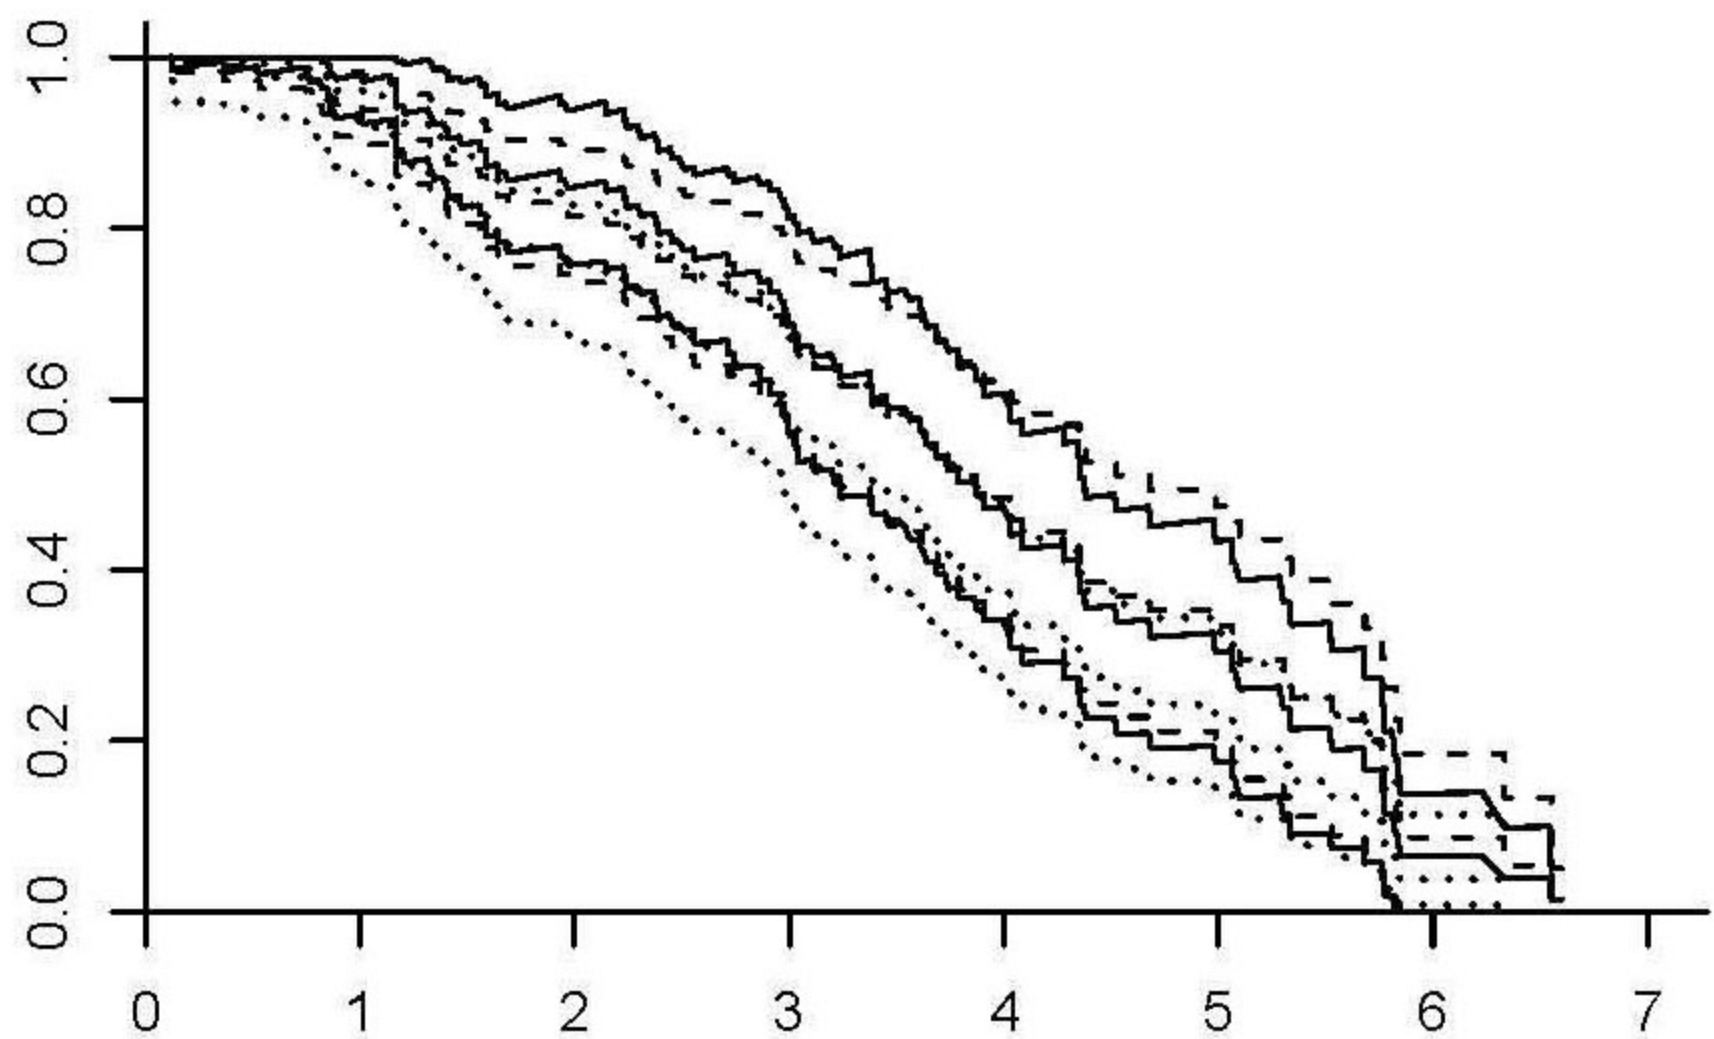

Years

Survival Probability

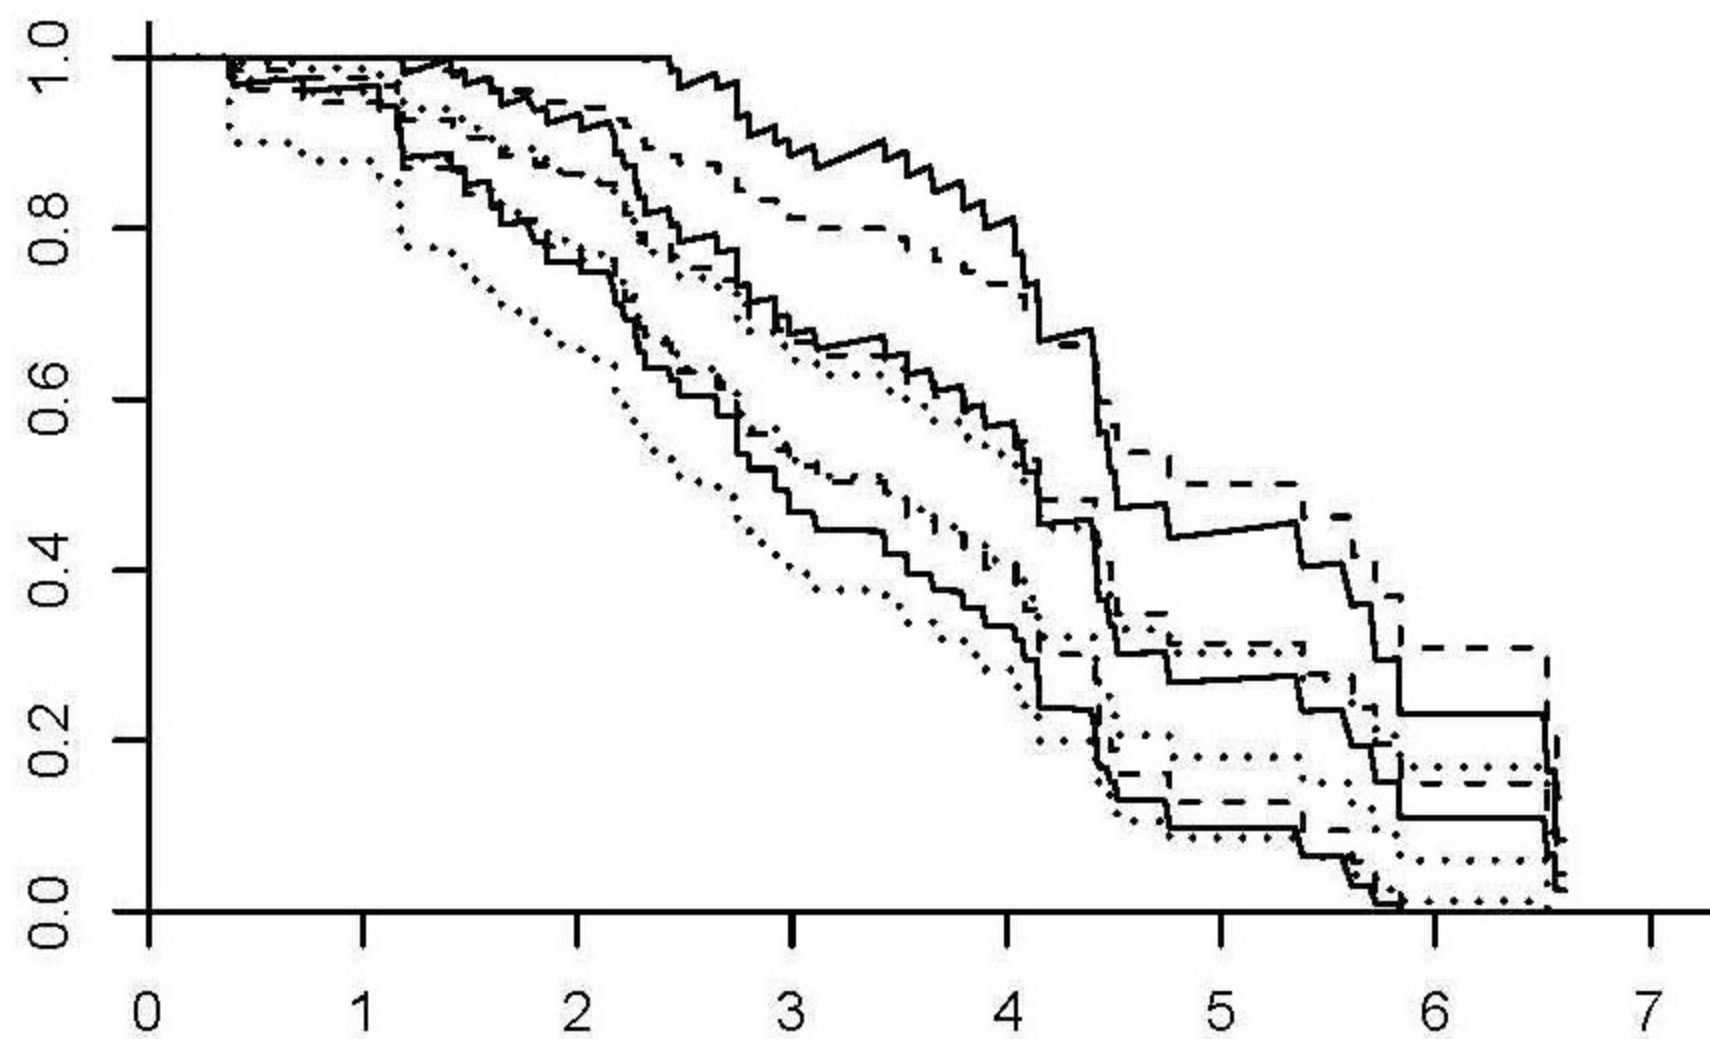

Years
